# Supplementary material
Source: PubMed Central journal article supplement (PMC3190877)

# Figure S1

Hsu *et al.*, 2011

A

LNCaP

22Rv1

AR

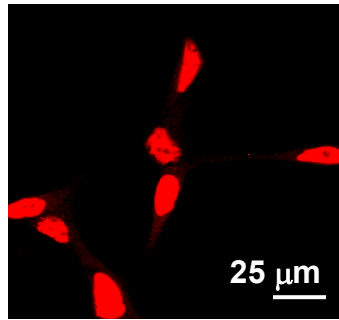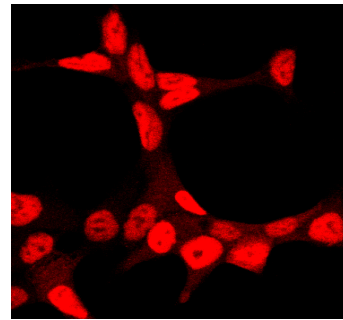

Cdk5

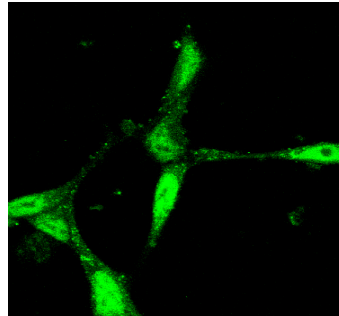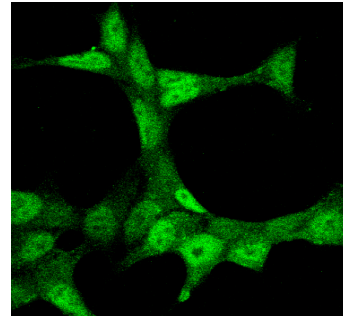

Merge

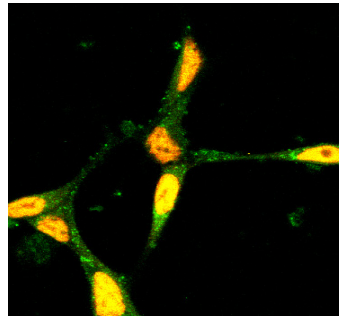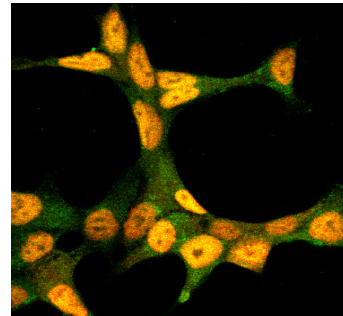

DAPI

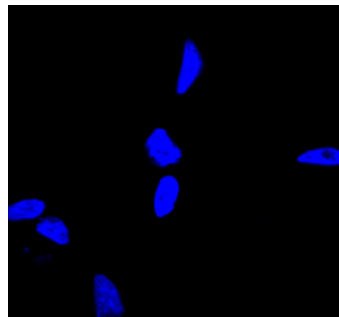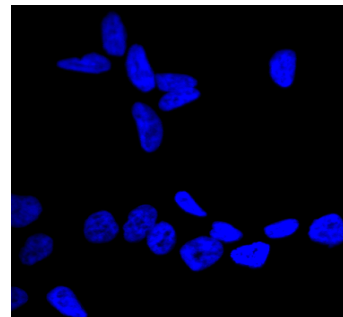

Phase

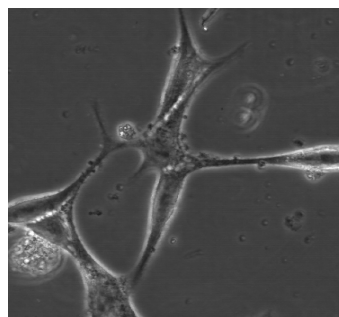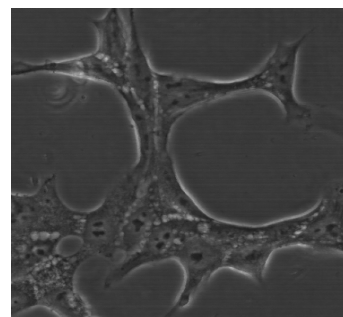

**B**

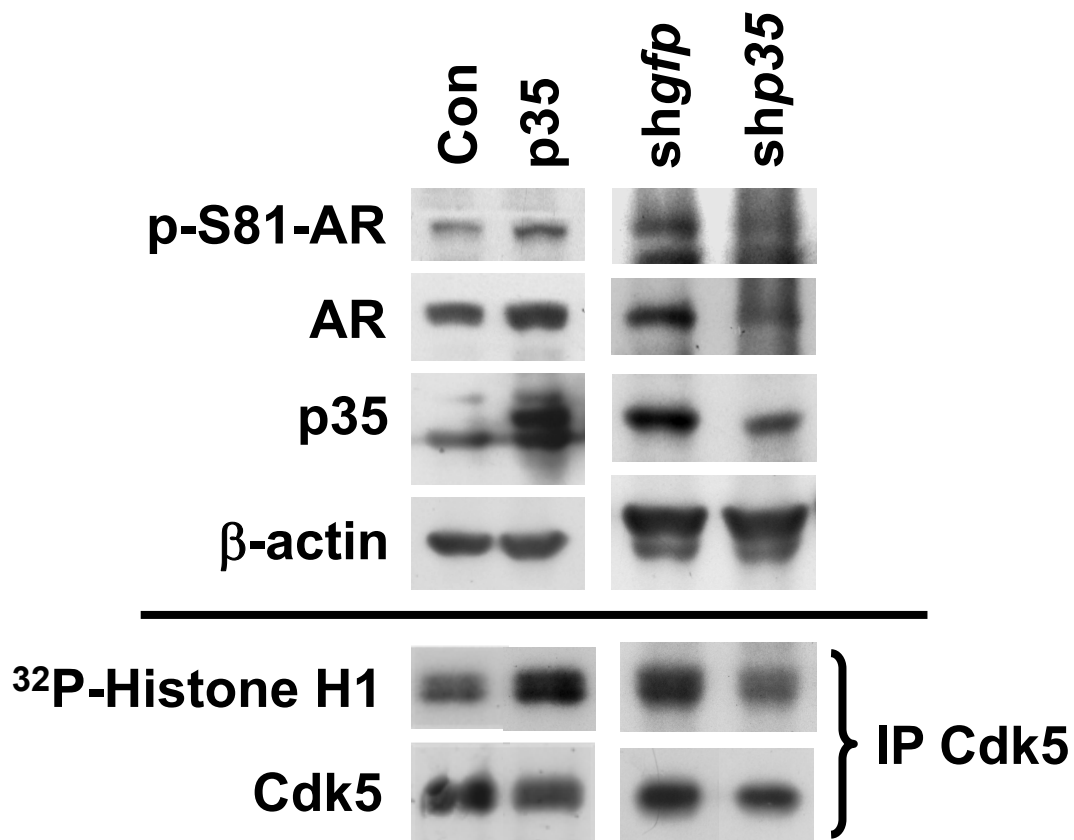

**A**

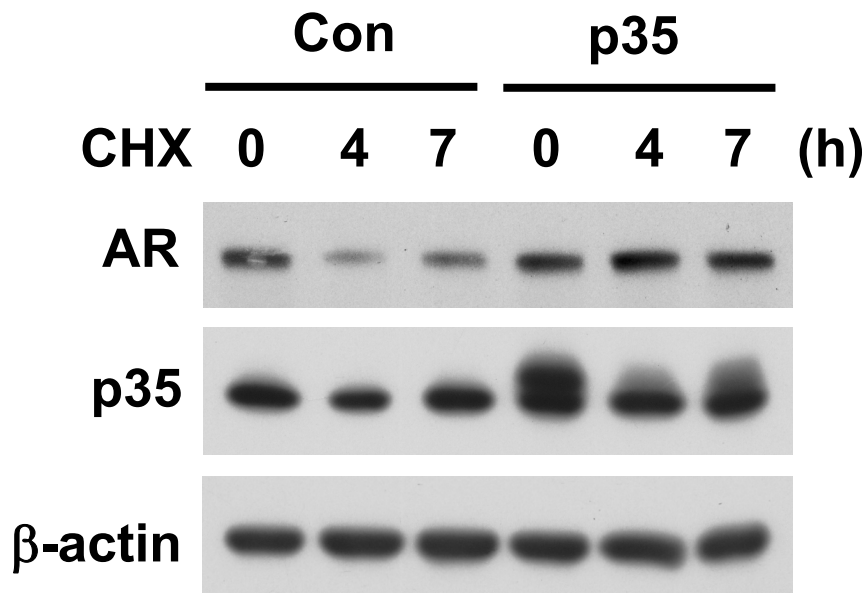

**B**

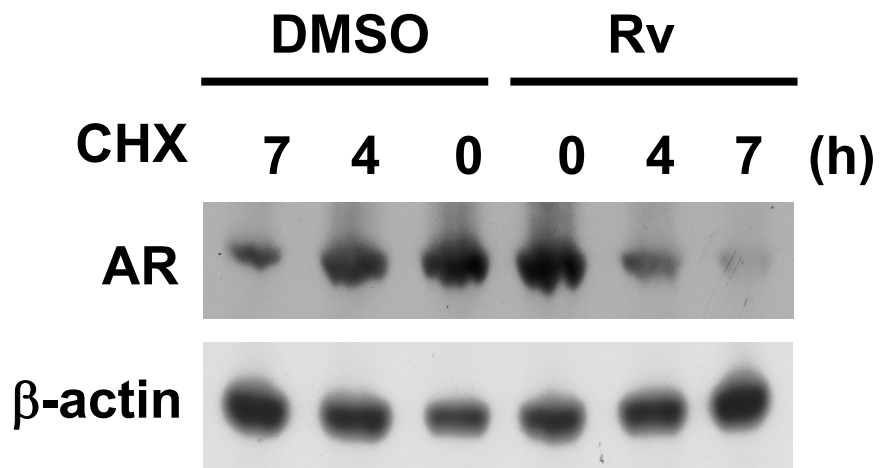

**C**

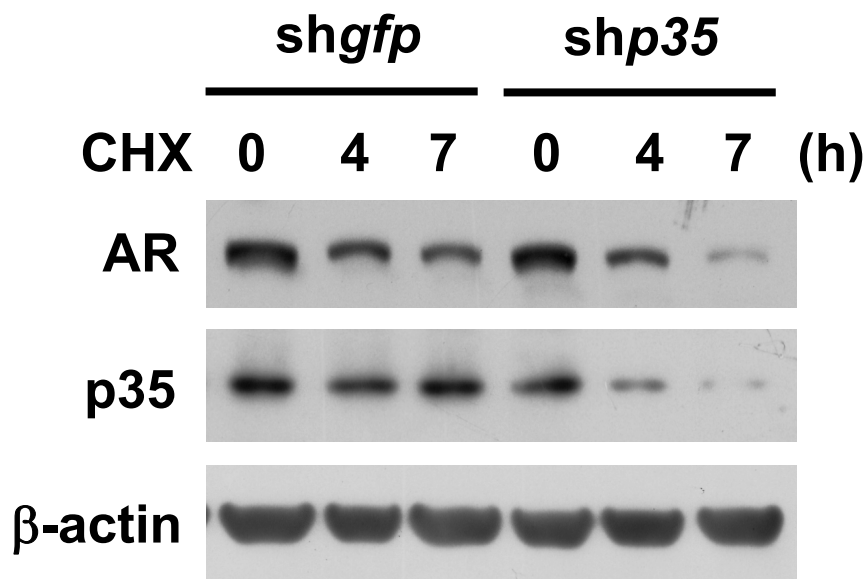

**D**

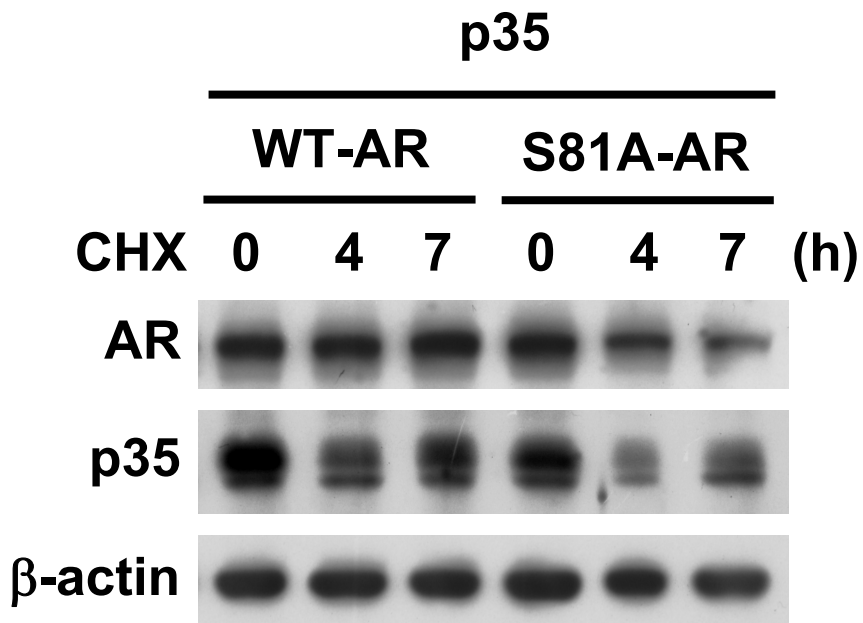

**A**

**siRNA-control**

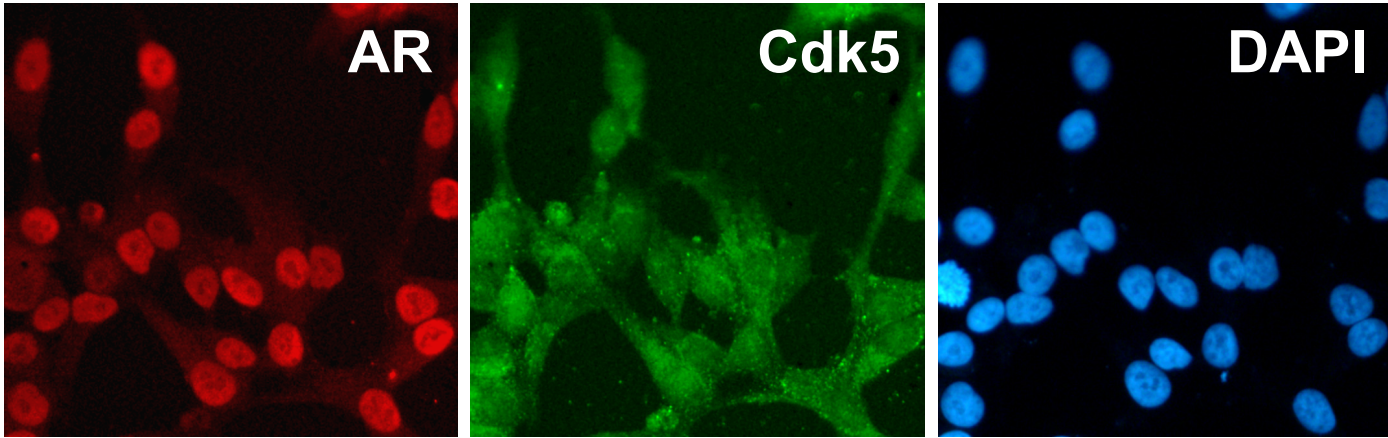

**B**

**pEGFP-Cdk5**

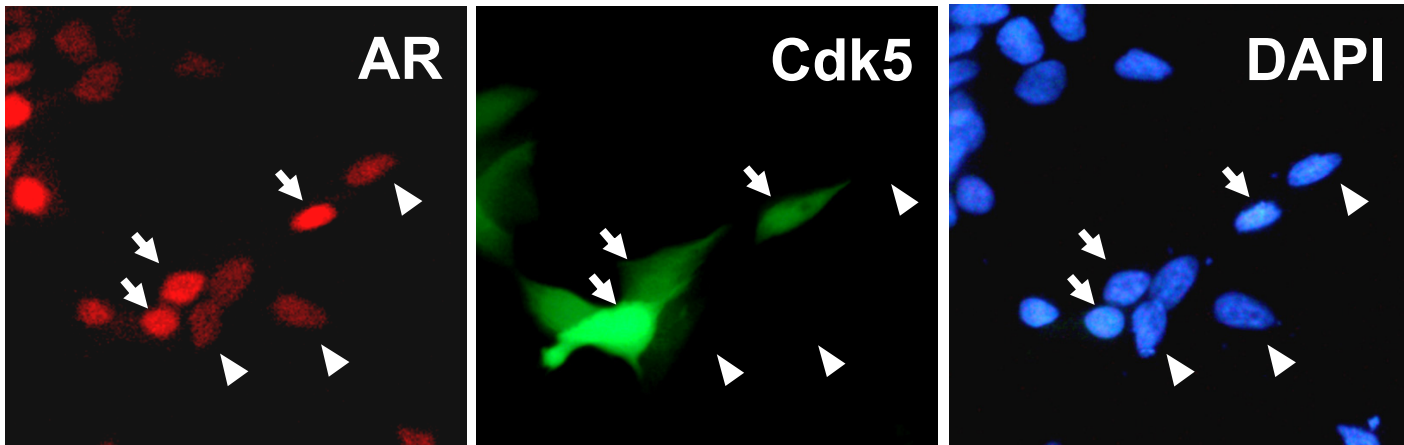

**C**

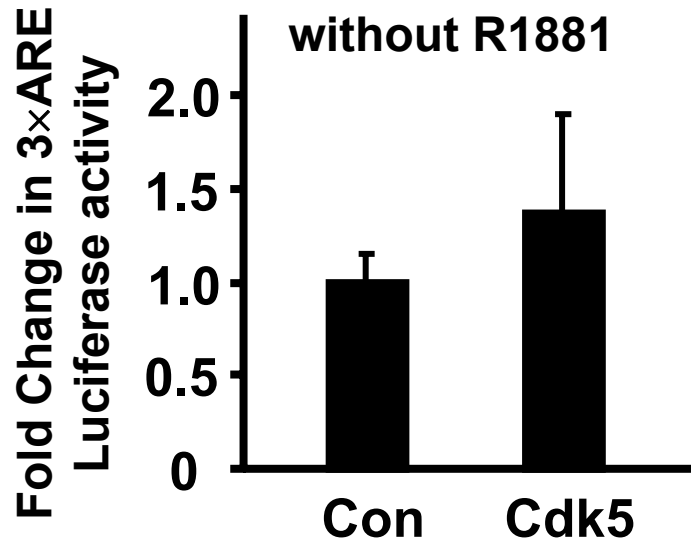

**D**

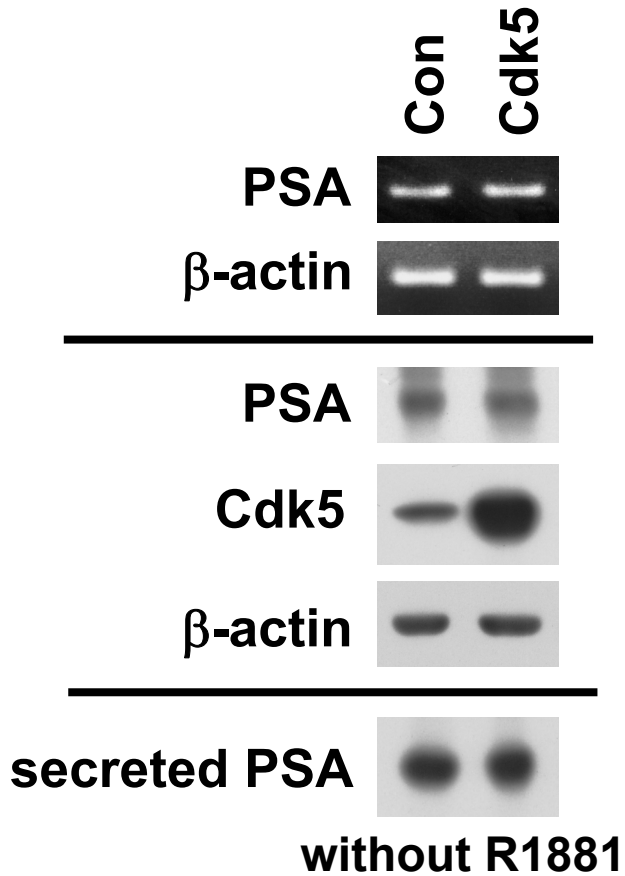

**Figure S4**

**Hsu *et al.*, 2011**

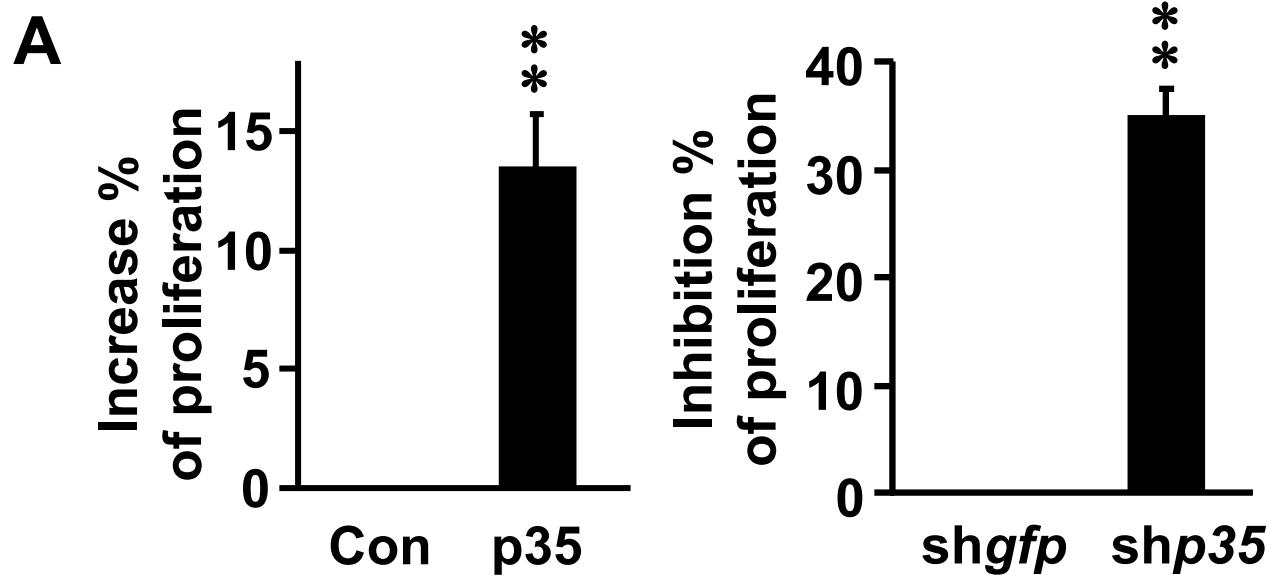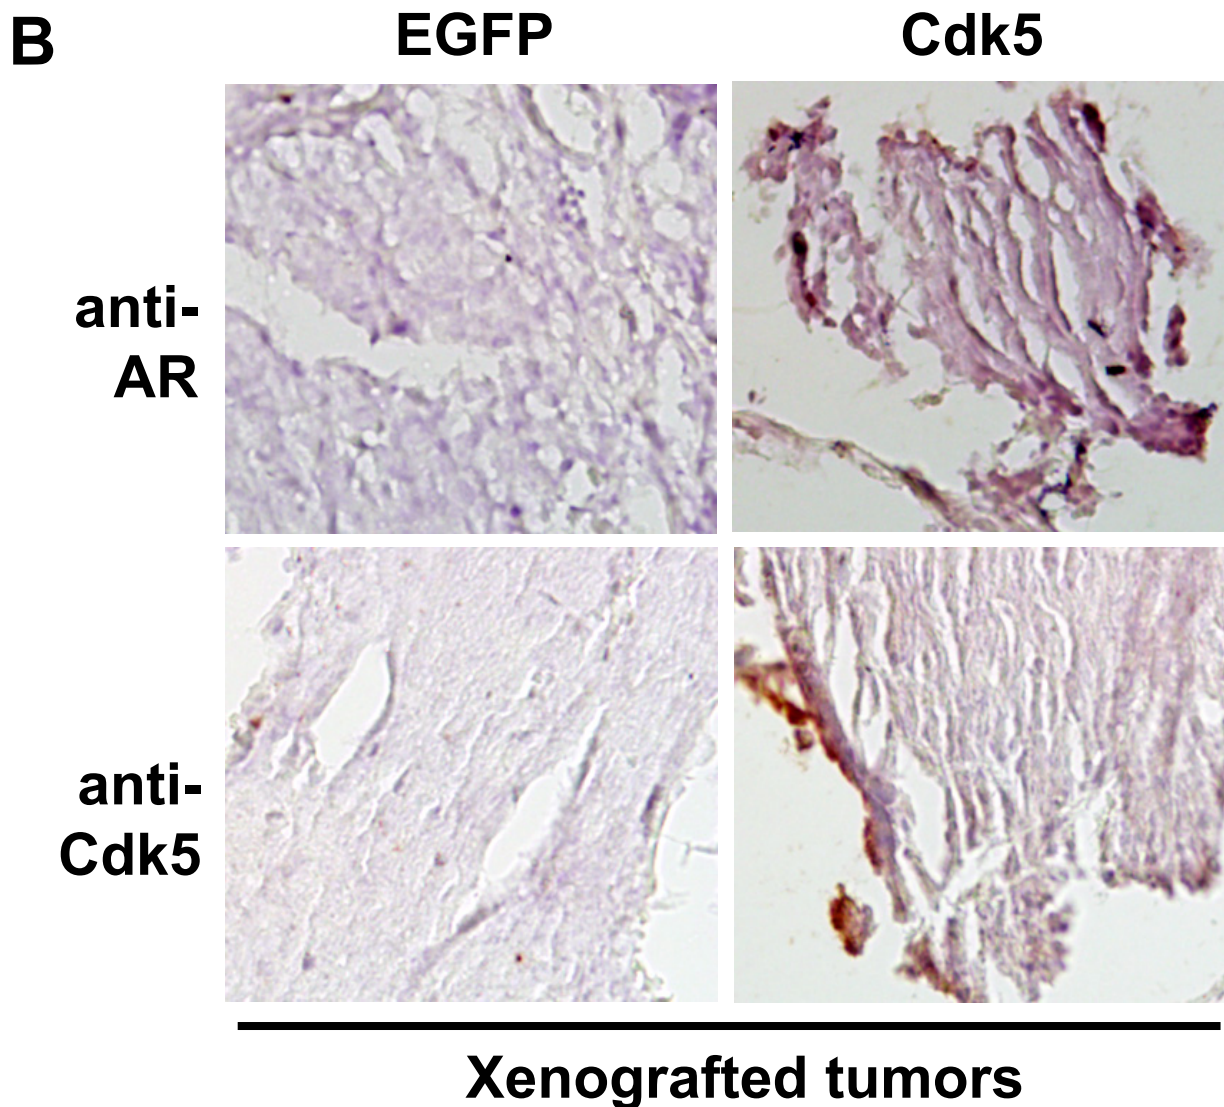

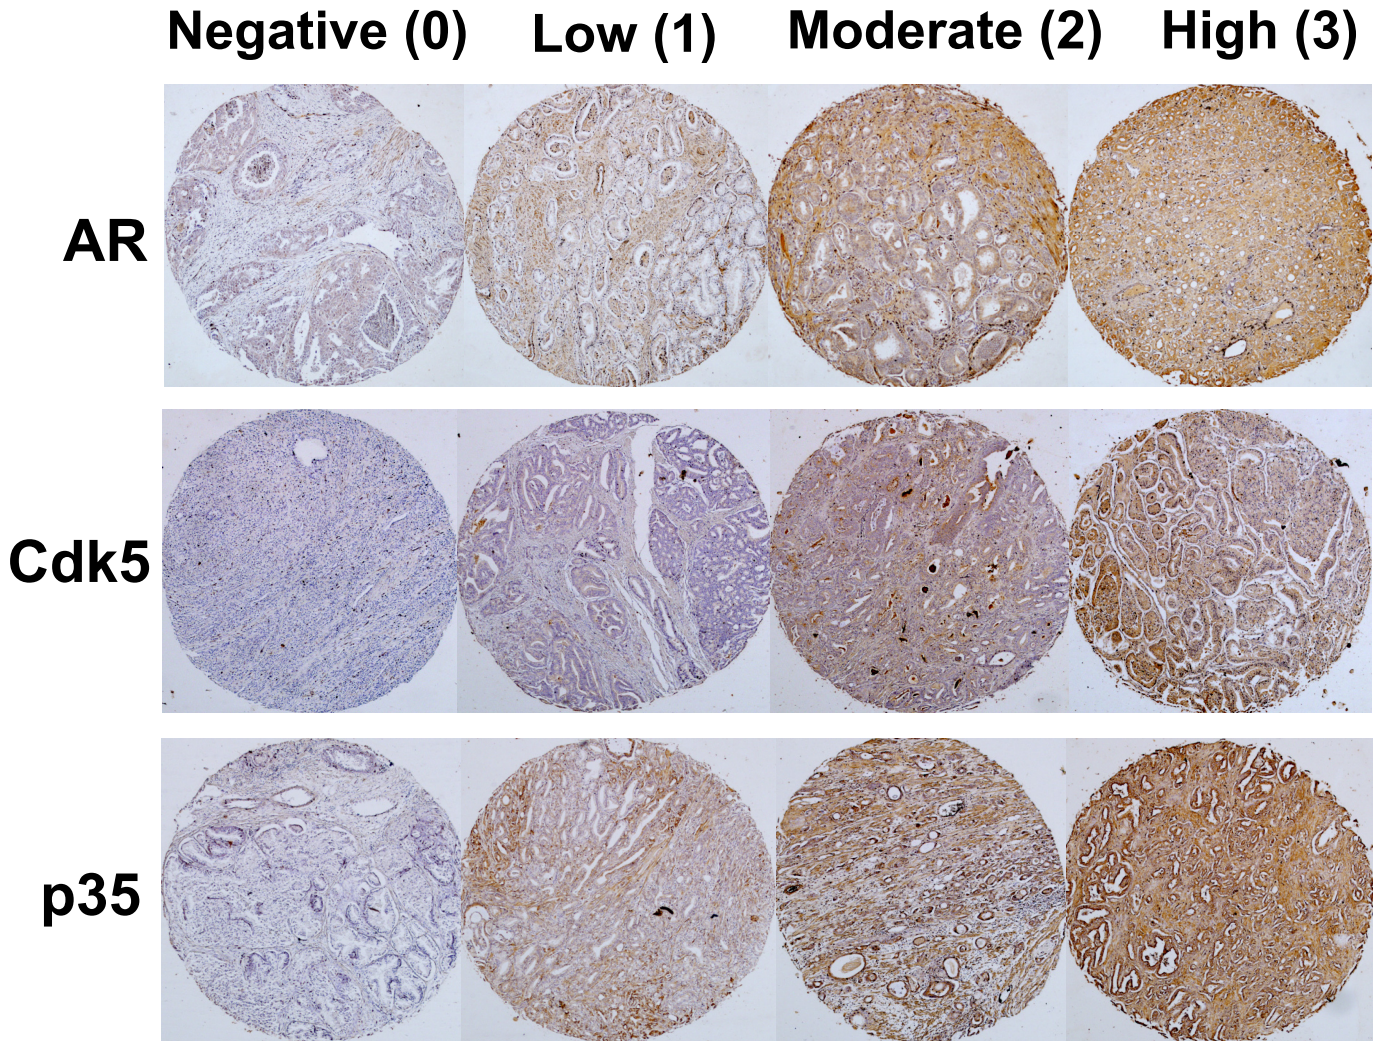

Supplement: supp_M111.252080_jbc.M111.252080-1.pdf [file supp_M111.252080_jbc.M111.252080-1.pdf]
